# Supplementary material for: Homologous High-Level Lipase and Single-Cell Protein Production with Engineered Yarrowia lipolytica via Scale-Up Fermentation for Industrial Applications
Source: MDPI journal article supplement (doi:10.3390/fermentation9030268), 2023-03-09
Supplement: s1 [file s1]

Archive with 1 entries (1 files):
- fermentation-2270792-supplementary.pdf
