# Supplementary figures and images for: Homologous High-Level Lipase and Single-Cell Protein Production with Engineered Yarrowia lipolytica via Scale-Up Fermentation for Industrial Applications
Source: MDPI journal article supplement (doi:10.3390/fermentation9030268), 2023-03-09

Supplementary Figure S1

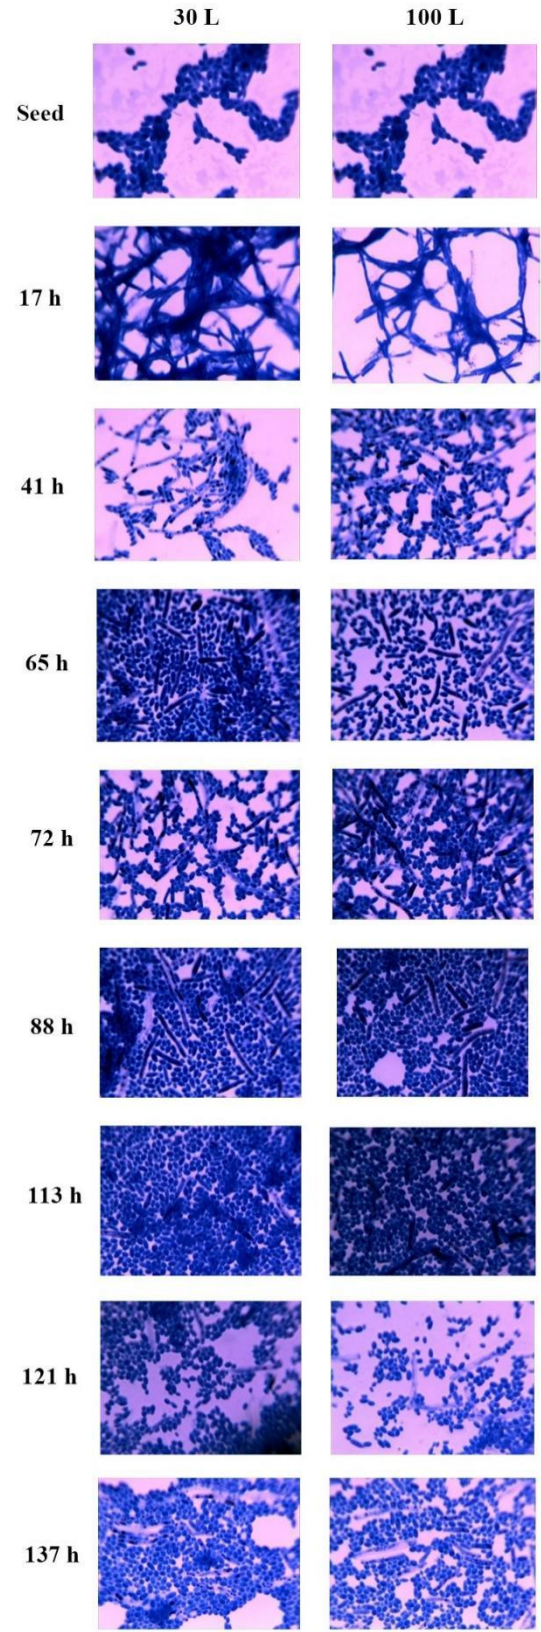

Supplement: s1 [file s1 › fermentation-2270792-supplementary.pdf]
